# Supplementary material for: Diagnosis of penicillin allergy: a MOFs-based composite hydrogel for detecting β-lactamase in serum
Source: Royal Society of Chemistry journal article supplement (doi:10.1039/c8cc08245f), 2018-11-21
Supplement: c8cc08245f1.pdf [file c8cc08245f1.pdf]

## Supporting Information

### Diagnosis of penicillin allergy: a MOFs-based composite hydrogel for detecting $\beta$ -lactamase in serum

Xiao Lian<sup>a</sup> and Bing Yan<sup>\*a,b</sup>

<sup>a</sup> *Shanghai Key Lab of Chemical Assessment and Sustainability, School of Chemical Science and Engineering, Tongji University, Siping Road 1239, Shanghai 200092, China*

<sup>b</sup> *School of Materials Science and Engineering, Liaocheng University, Liaocheng 252000, China*

Corresponding author: Prof. Dr. Bing Yan, Email: [byan@tongji.edu.cn](mailto:byan@tongji.edu.cn)

#### Experimental Section

**Materials and Reagents:**  $\text{Eu}(\text{OH})_3$  was prepared from  $\text{Eu}_2\text{O}_3$  via hydrothermal method. All other reagents and solvents were commercially available and of analytical pure grade. Penicillamine (Pen, 98%) and  $\beta$ -lactamase (10 MU) were purchased from Aladdin.

**Synthesis of  $[\text{Eu}_2(\text{BPDC})(\text{BDC})_2(\text{H}_2\text{O})_2]_n$  (1):**  $[\text{Eu}_2(\text{BPDC})(\text{BDC})_2(\text{H}_2\text{O})_2]_n$  was synthesized according to the previous literature.<sup>1</sup> Typically, a mixture of  $\text{Eu}(\text{OH})_3$ ,  $\text{H}_2\text{bpydc}$  (2,2'-bipyridine-3,3'-dicarboxylic acid, Adamas-beta, 97%),  $\text{H}_2\text{bdc}$  (1,4-benzenedicarboxylic acid, Lancaster Synthesis, 98%) and  $\text{H}_2\text{O}$  with a molar ratio of 0.4: 0.6: 0.3: 0.56 was added into a polytetrafluoroethylene-lined steel autoclave. The autoclave was heated at 433 K for 72 h and then slowly cooled down to room temperature. The product was collected with centrifugation and washed with DI water several times.

**Synthesis of nanoscale  $[\text{Eu}_2(\text{BPDC})(\text{BDC})_2(\text{H}_2\text{O})_2]_n$  (1):**  $\text{Eu}(\text{OH})_3$  (0.162g, 0.8 mmol),  $\text{H}_2\text{bpydc}$  (0.2932g, 1.2mmol),  $\text{H}_2\text{bdc}$  (0.0998g, 0.6mmol) and  $\text{AcONa}$  (0.4 mmol, Greagent, 99%) were dispersed in  $\text{H}_2\text{O}$  (20 mL), transfer into a 50 mL autoclave after stirring for 20 min. The autoclave was heated at 433 K for 72 h and then naturally cooled down to room temperature. The product was collected with centrifugation and washed with DI water.

**Preparation of 1@SA composite hydrogel:** The homogenous suspension (A) of nanoscale 1 powder was prepared in deionized water ultrasonically. The sodium alginate solution

(B) was obtained by dissolving sodium alginate (SA, Adamas-beta) in deionized water under heated. A mixture of (A) and (B) was obtained by drop-wise addition of suspension (A) to the SA solution, and the mixtures were stirred constantly for 1 h to get a homogeneous mixture. Subsequently, the mixture was later injected into a glass bottle or a self-made mold and then carefully immersed in  $\text{Fe}^{3+}$  ions solution for 12 h to produce hydrogels. The formed hydrogel bodies were then washed with deionized water to remove non-coordinated  $\text{Fe}^{3+}$  ions.

In order to prepare hydrogels of different shapes, the mixture is placed in a mold of different shapes and stored in a refrigerated state for one night, and then the coagulated mold was placed in the  $\text{Fe}^{3+}$  solution for 12 h. The formed hydrogel bodies were then washed with deionized water to remove non-coordinated  $\text{Fe}^{3+}$  ions.

**Detecting  $\beta$ -lactamase:** Penicillin was dissolved in serum to  $30 \text{ mg L}^{-1}$  and adjusted pH to 4.5, and put the hydrogel immersed into the prefabricated serum. After added various moments of  $\beta$ -lactamase and incubated for 20 min at  $32^\circ\text{C}$ , the hydrogel was measured PL spectra using a FLS920 spectrometer, the emission intensities of **1@SA** was recorded. The slope (S) was obtained from linear fitting between fluorescent intensity and concentrations of enzymes. The limit of detection (LOD) was calculated with the equation:  $\text{LOD} = 3S_b/S$  (where  $S_b$  is standard deviation of blank sample). All experiments were triplicated. The photographs of hydrogels were shot after treatment with  $\beta$ -lactamase under a 365 UV lamp irradiated.

**Characterization and Instruments:** The powder X-ray diffraction (PXRD) patterns were recorded with a Bruker D8 ADVANCE diffractometer using  $\text{Cu K}\alpha$  radiation with 40 mA and 40 kV. SEM was performed on a Hitachi S-4800 field emission scanning electron microscope operating at 3 kV. Energy dispersive analysis of X-rays (EDX) spectrum and EDX-mapping image were obtained by the FE-SEM operating at 15 kV. X-ray photoelectron (XPS) spectra were recorded under ultrahigh vacuum ( $<10^{-6} \text{ Pa}$ ) at a pass energy of 93.90 eV with an Axis Ultra DLD spectrometer (Kratos, Japan) by using an  $\text{Mg K}\alpha$  (1253.6 eV) anode. All binding energies were adjusted by using contaminant carbon ( $\text{C } 1s = 284.8 \text{ eV}$ ). Attenuated total reflection Fourier transform infrared (ATR-FTIR) spectra were recorded from 4000 to  $400 \text{ cm}^{-1}$  using a Nicolet IS10 infrared spectrophotometer with a smart DuraSamplIR Diamond ATR accessory. The excitation and emission spectra of the solid samples were obtained on an Edinburgh FLS920 spectrophotometer with a 450 W xenon lamp as an excitation source. Luminescence lifetime measurements were carried out on an Edinburgh FLS920 phosphorimeter using a microsecond lamp (100 mW).

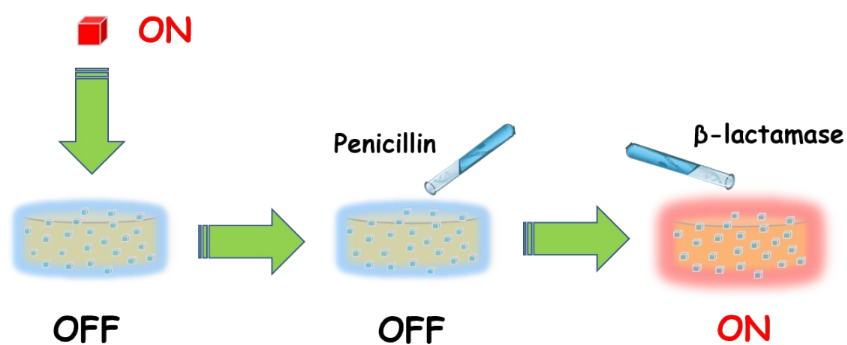

**Scheme S1** Schematic diagram of the “ON-OFF-OFF-ON” luminescent trigger pattern.

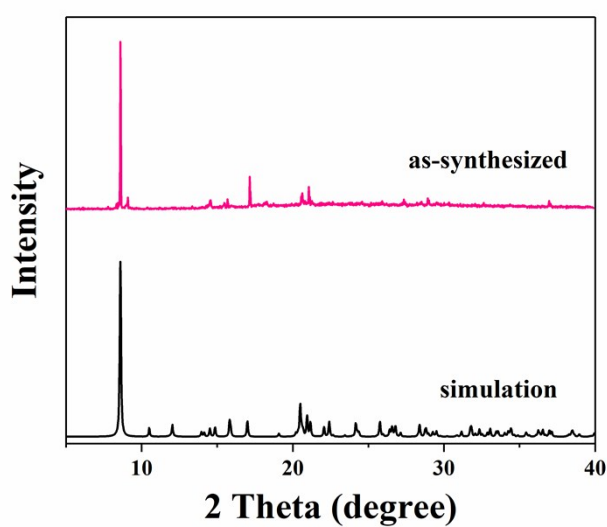

**Fig. S1** PXRD patterns of simulated **1** and as-synthesized **1**.

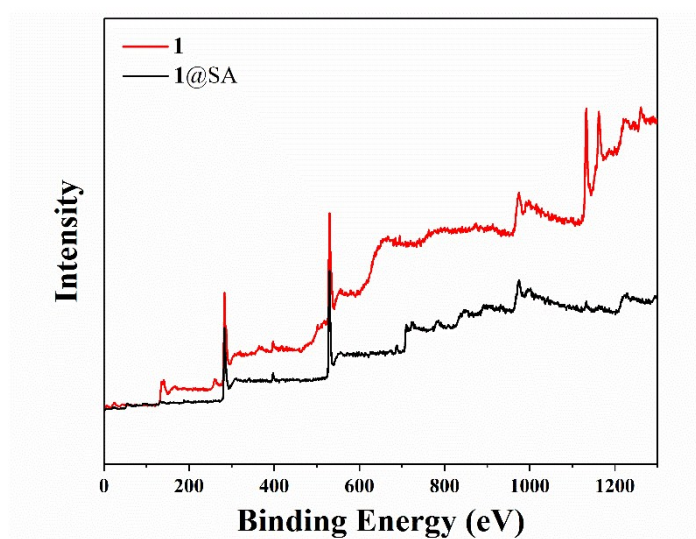

**Fig. S2** XPS spectra of **1** and **1@SA** hydrogel.

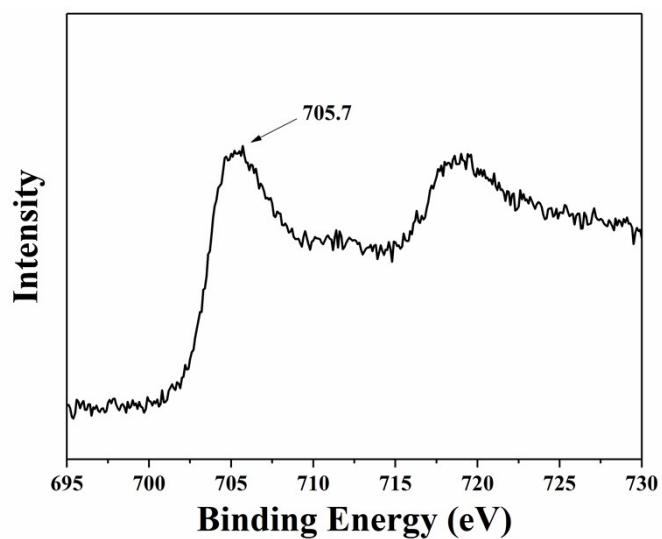

**Fig. S3** Fe 2p XPS spectrum of 1@SA.

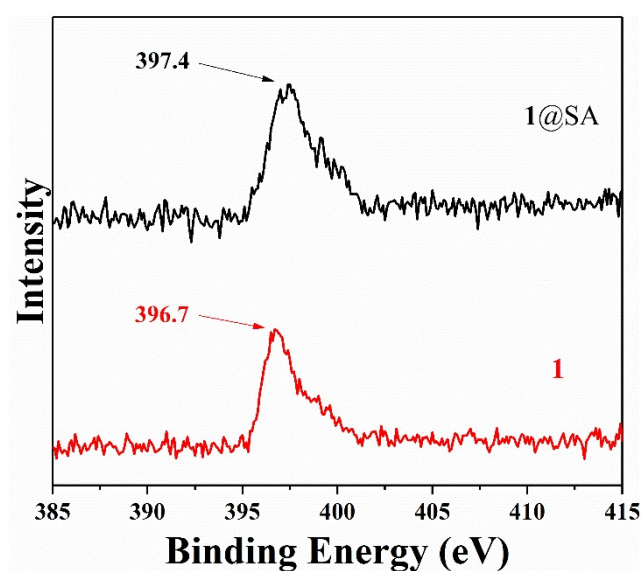

**Fig. S4** N 1s XPS spectra of **1** and 1@SA hydrogel.

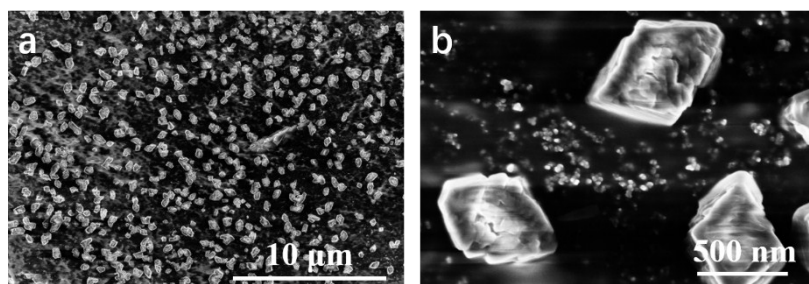

**Fig. S5** SEM images of as-synthesized nanoscale **1** with irregular skew cube morphology.

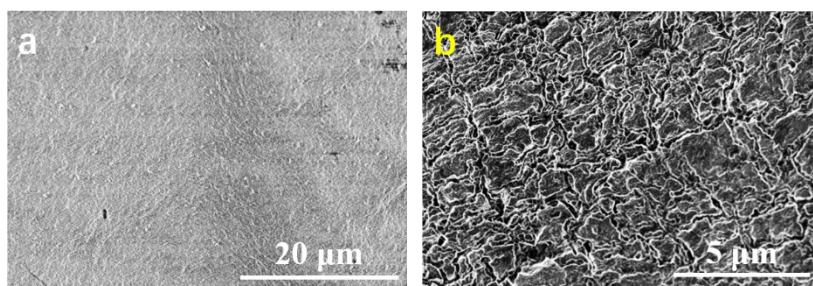

**Fig. S6** SEM images of **1@SA** composite hydrogel at large (a) and amplification area (b).

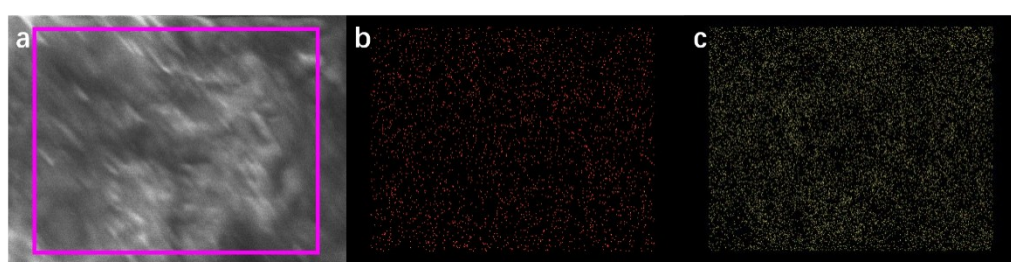

**Fig. S7** EDX-mapping images of hydrogel **1@SA** (a) for element Eu (b) and Fe (c).

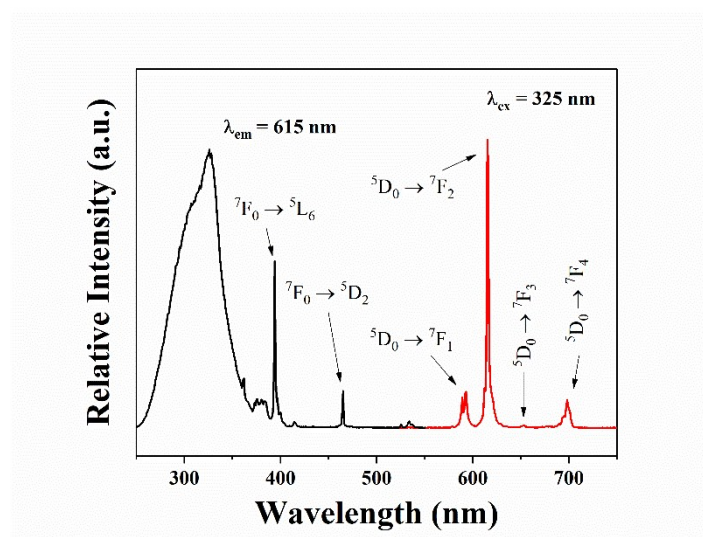

**Fig. S8** Excitation and emission spectra of powder **1**.



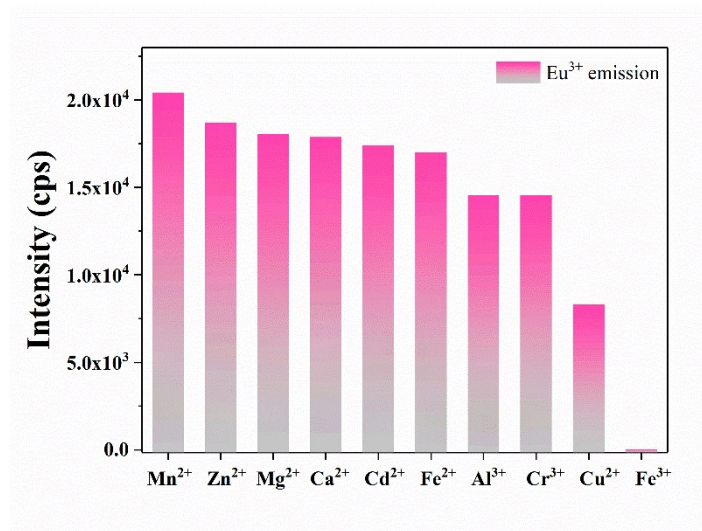

**Fig. S9** Histogram for the Eu<sup>3+</sup> emission of **1**@SA hydrogels undergoes various cation solutions immersion.

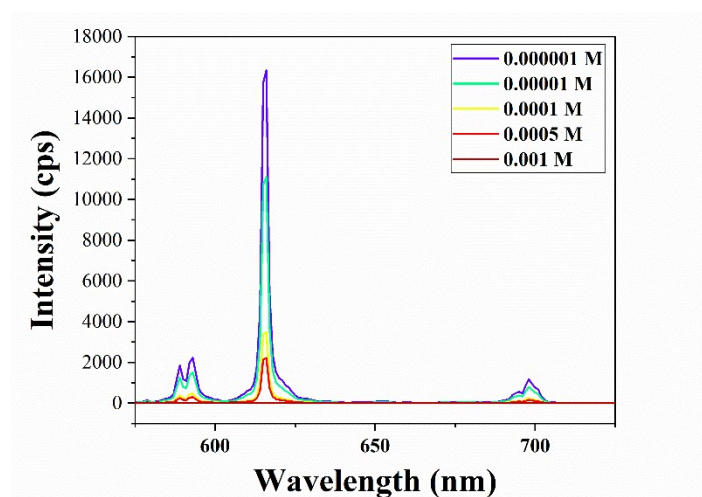

**Fig. S10** Emission spectra of **1** undergo Fe<sup>3+</sup> aqueous solutions with different concentration from 10<sup>-6</sup> – 10<sup>-3</sup> M.

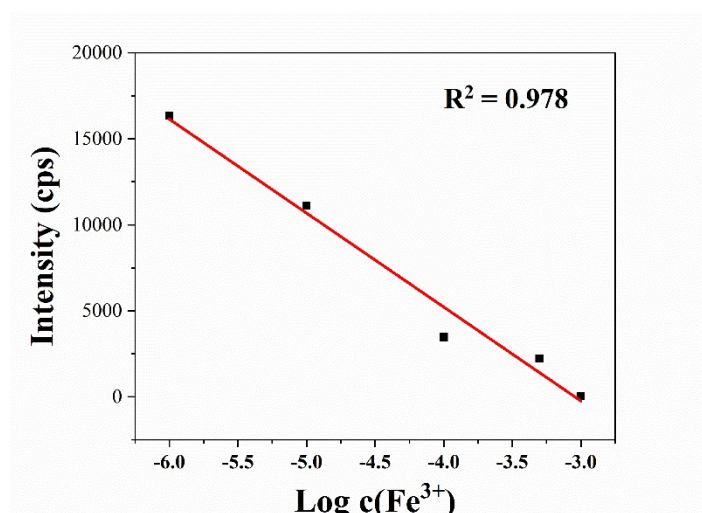

**Fig. S11** Linear curve of the luminescent intensity of **1** toward Fe<sup>3+</sup> concentration in aqueous solutions. The stern-volmer equation ( $R^2 = 0.978$ ) is:

$$I_1 = -5460 \log C_{Fe^{3+}} - 16621 \quad (S1)$$

And the binding constant between Fe<sup>3+</sup> and **1** is 5460.

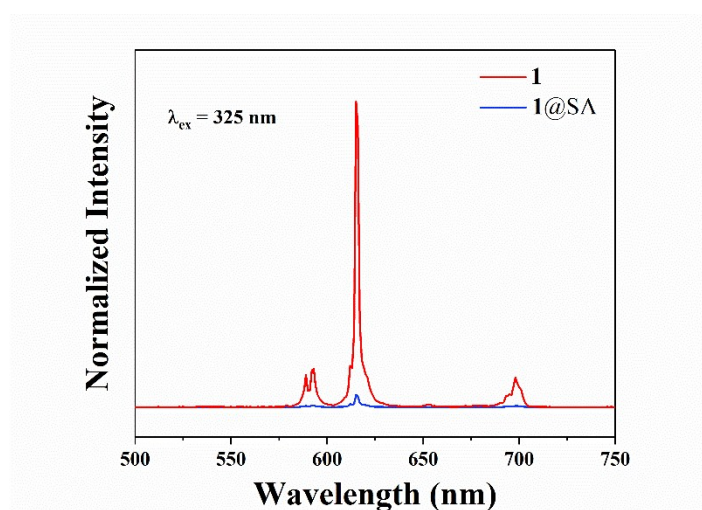

**Fig. S12** A comparison of the emission intensities of **1** and **1@SA**. The emission intensities are normalized.

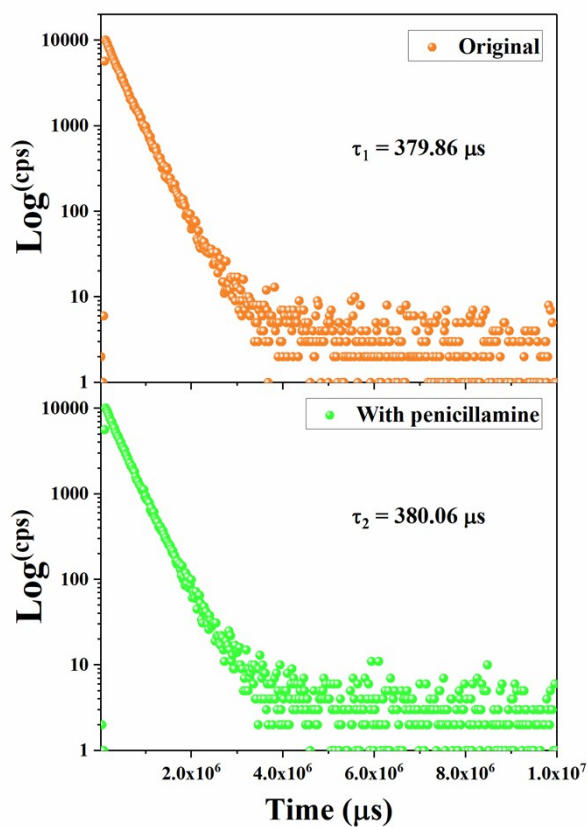

**Fig. S13** Luminescence decay curves of **1@SA** hydrogels immersed in H<sub>2</sub>O (top) and penicillamine solution (0.001 M) (down).

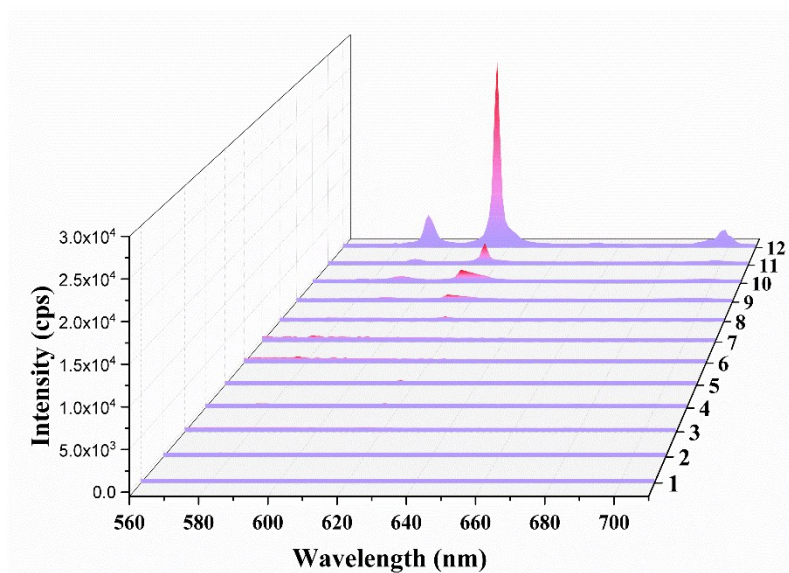

**Fig. S14** Emission spectra of **1@SA** hydrogels immersed in various chemical solutions (1: Na<sup>+</sup>, 2: K<sup>+</sup>, 3: phenethylamine, 4: cysteine, 5: glutathione, 6: histamine, 7: histidine, 8: dopamine, 9: PO<sub>4</sub><sup>3-</sup>, 10: glucose, 11: ascorbic acid, 12: penicillamine).



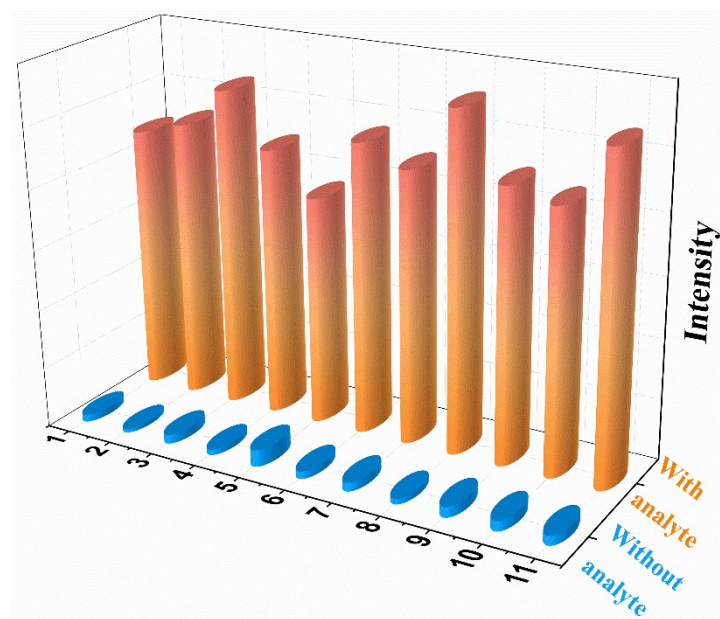

**Fig. S15** Luminescence responses (blue: without penicillamine; orange: with penicillamine) of **1@SA** toward penicillamine in the presence of background of other chemicals (1:  $\text{Na}^+$ , 2:  $\text{K}^+$ , 3: phenethylamine, 4: cysteine, 5: glutathione, 6: histamine, 7: histidine, 8: dopamine, 9:  $\text{PO}_4^{3-}$ , 10: glucose, 11: ascorbic acid).

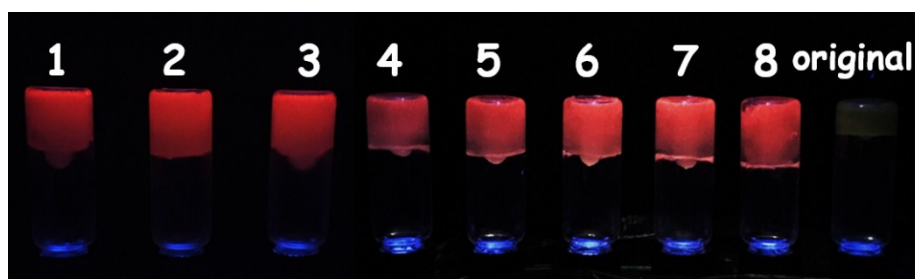

**Fig. S16** Corresponding photographs of the luminescence responses of **1@SA** toward penicillamine in the presence of background of other chemicals (1:  $\text{Na}^+$ , 2:  $\text{K}^+$ , 3: phenethylamine, 4: histamine, 5: histidine, 6: dopamine, 7: glucose, 8: ascorbic acid).

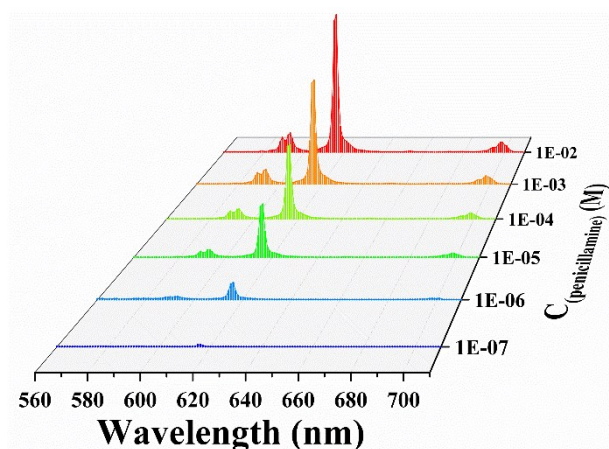

**Fig. S17** The emission spectra of **1@SA** undergo penicillamine aqueous solutions with different concentration from  $10^{-7}$  –  $10^{-2}$  M.

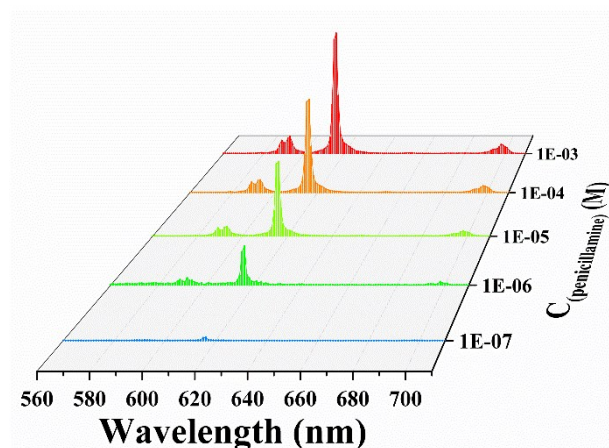

**Fig. S18** The emission spectra of **1@SA** undergo different concentrations from  $10^{-7}$  –  $10^{-3}$  M of penicillamine in serum.

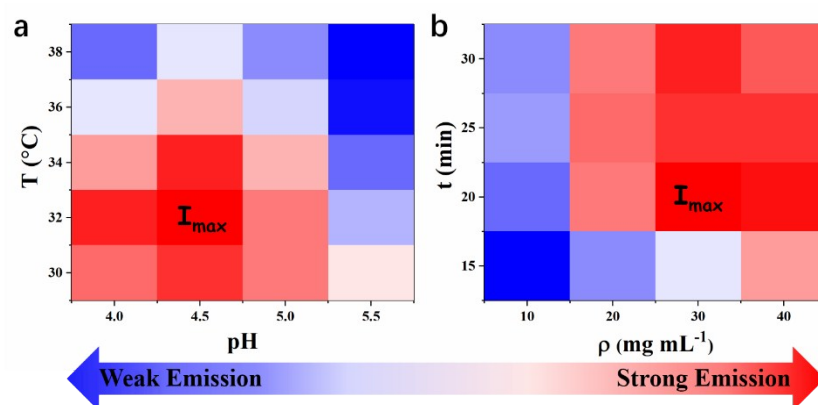

**Fig. S19** Optimal selection of the conditions of  $\beta$ -lactamase activities test: (a) incubation temperature and pH; (b) reaction time and concentration of penicillin.

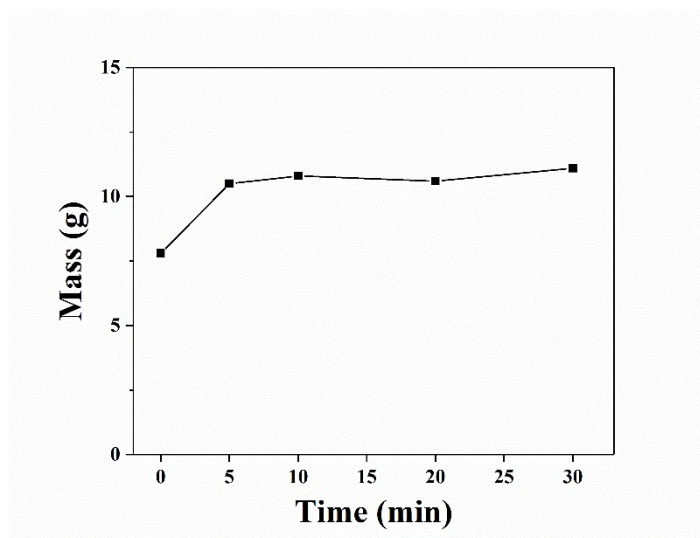

**Fig. S20** The quality change of hydrogel **1@SA** in water.

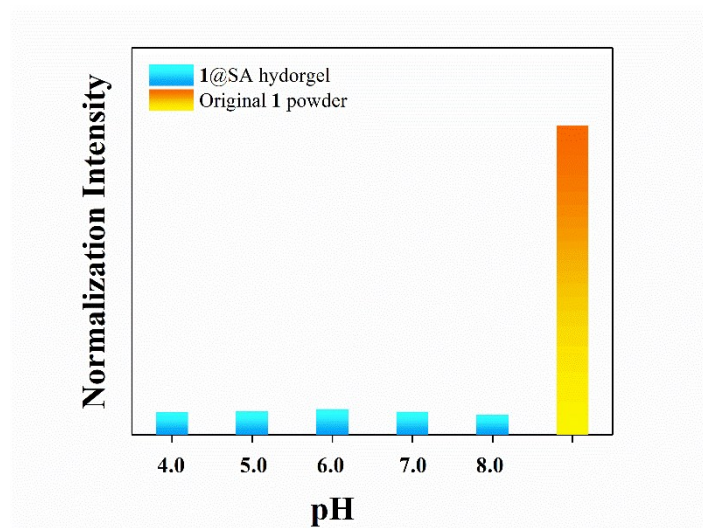

**Fig. S21** Comparison of the emission intensities of **1**@SA immersed in different pH solutions for 20 min. The emission of original **1** powder was used as a reference for other samples, and the emission intensities are normalized.

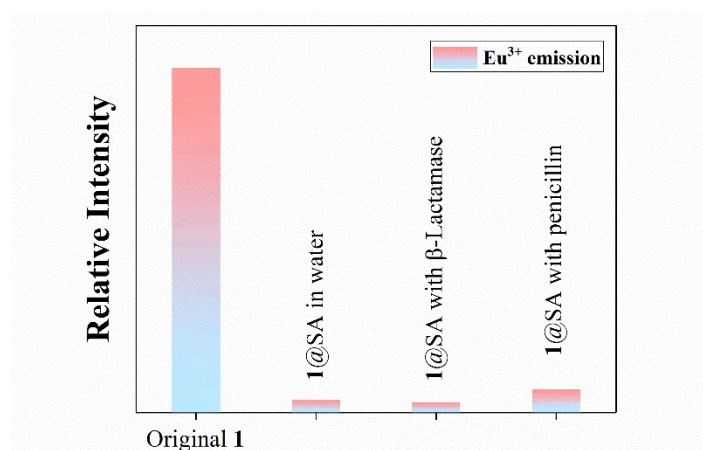

**Fig. S22** The blank control experiment of **1**@SA, the emission of original **1** powder was used as a reference for other samples, and the emission intensities are normalized.

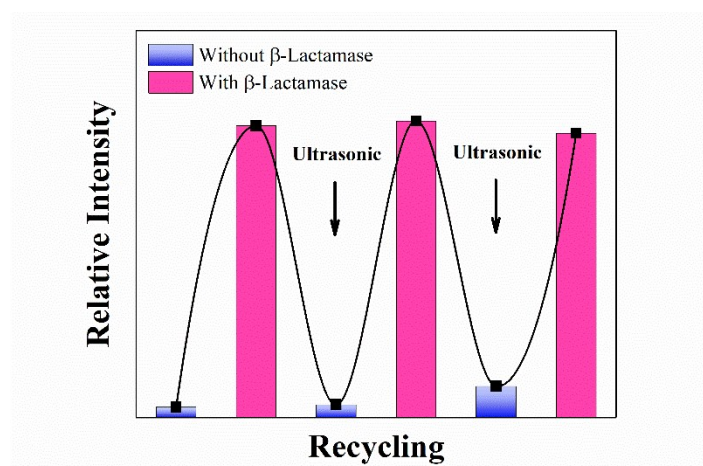

**Fig. S23** The luminescence intensity of **1**@SA after five recycles.

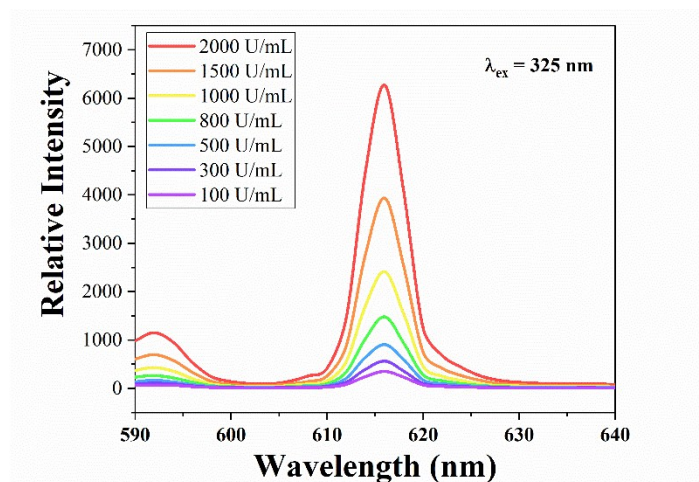

**Fig. S24** Time-resolved emission spectra of 1@SA with different concentrations of  $\beta$ -lactamase.

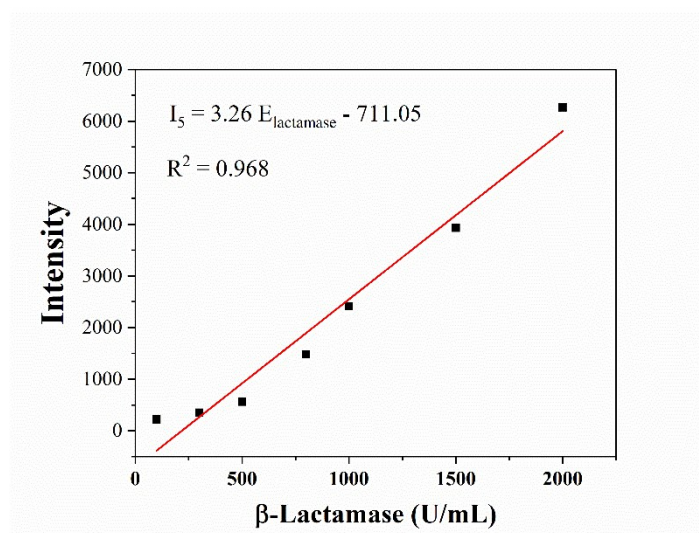

**Fig. S25** Linear curve between intensities of 1@SA from the time-resolved emission spectra and the  $\beta$ -lactamase concentrations.

**Table S1** The comparison of the detecting performance of different sensing systems for the  $\beta$ -lactamase activities.

| Sensor systems                             | Sample source | LOD                     | Reference |
|--------------------------------------------|---------------|-------------------------|-----------|
| Iodometry kit                              | Milk          | 50 U mL <sup>-1</sup>   | 39        |
| Fluorescent sensor based on graphene oxide | Milk          | 0.5 U                   | 40        |
| HPLC                                       | Milk          | 4 U mL <sup>-1</sup>    | 41        |
| Luminescent hydrogel                       | Serum         | 1.25 U mL <sup>-1</sup> | This work |

Reference

1. J. M. Zhou, W. Shi, N. Xu and P. Cheng, *Inorg. Chem.*, 2013, **52**, 8082.
